# Supplementary material for: Can patient involvement improve patient safety? A cluster randomised control trial of the Patient Reporting and Action for a Safe Environment (PRASE) intervention
Source: PubMed Central journal article supplement (PMC5537521; doi:10.1136/bmjqs-2016-005570), 2017-02-03

## Appendix 1: Outline logic model for the PRASE Intervention

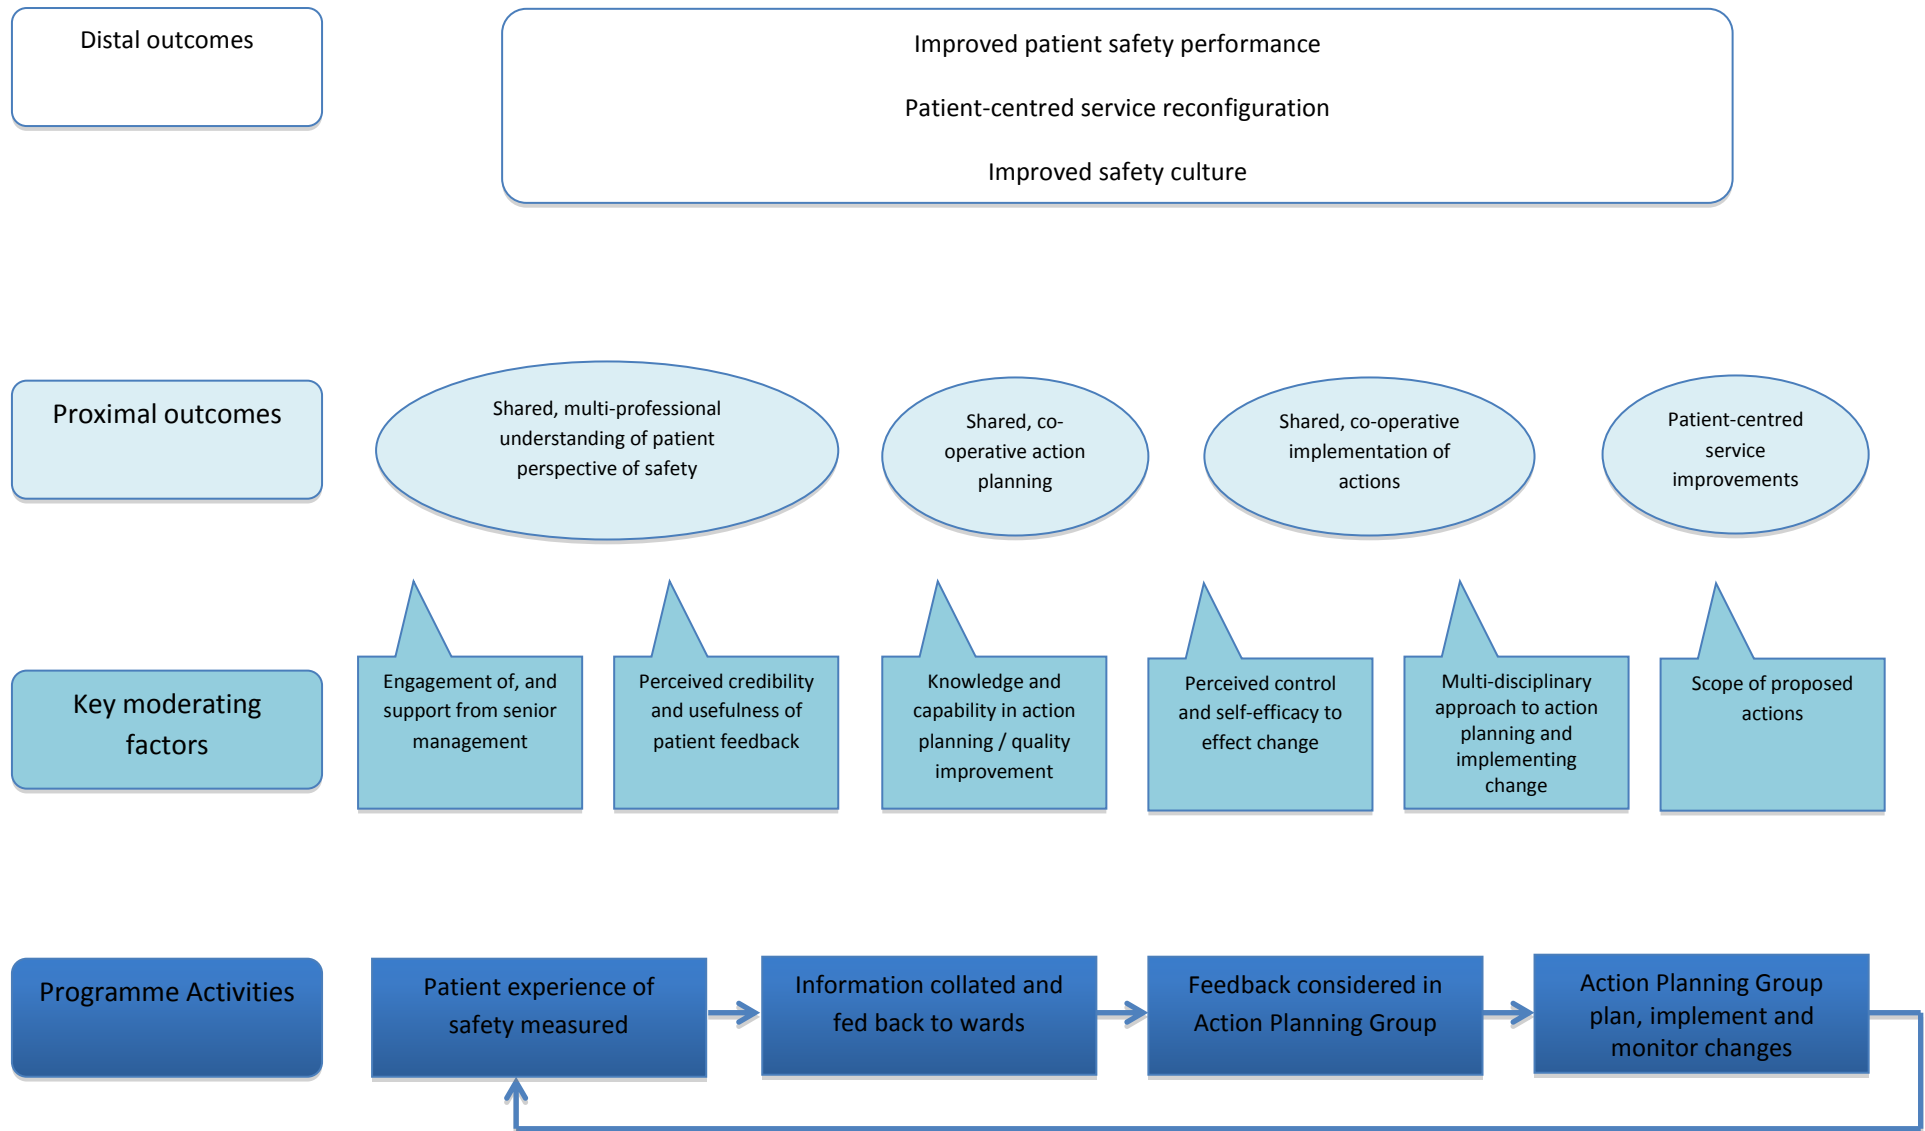

Supplement: bmjqs-2016-005570supp001.pdf [file bmjqs-2016-005570supp001.pdf]
