# Supplementary material for: Can patient involvement improve patient safety? A cluster randomised control trial of the Patient Reporting and Action for a Safe Environment (PRASE) intervention
Source: PubMed Central journal article supplement (PMC5537521; doi:10.1136/bmjqs-2016-005570), 2017-02-03
Supplement: bmjqs-2016-005570supp002.pdf [file bmjqs-2016-005570supp002.pdf]

Appendix 2: Patient characteristics for PMOS respondents at each time point by allocation group

|                        | Baseline       |              | 6 months       |              | 12 months      |              |
|------------------------|----------------|--------------|----------------|--------------|----------------|--------------|
|                        | <i>Control</i> | <i>PRASE</i> | <i>Control</i> | <i>PRASE</i> | <i>Control</i> | <i>PRASE</i> |
| <b>N</b>               | 399            | 423          | 408            | 419          | 393            | 429          |
| <b>Age</b>             |                |              |                |              |                |              |
| Mean (SD)              | 60.2 (18.2)    | 61.7 (17.6)  | 60.1 (18.4)    | 61.4 (17.9)  | 58.3 (18.9)    | 58.2 (18.6)  |
| <b>Gender, n(%)</b>    |                |              |                |              |                |              |
| Female                 | 189 (47.4)     | 199 (47.0)   | 181 (44.4)     | 185 (44.2)   | 200 (50.9)     | 201 (46.9)   |
| Male                   | 209 (52.4)     | 221 (52.2)   | 223 (54.7)     | 231 (55.1)   | 186 (47.3)     | 219 (51.1)   |
| Missing                | 1 (0.3)        | 3 (0.7)      | 4 (1.0)        | 3 (0.7)      | 7 (1.8)        | 9 (2.1)      |
| <b>Ethnicity, n(%)</b> |                |              |                |              |                |              |
| Asian                  | 9 (2.3)        | 11 (2.6)     | 11 (2.7)       | 9 (2.1)      | 10 (2.5)       | 7 (1.6)      |
| Black                  | 7 (1.8)        | 4 (0.9)      | 4 (1.0)        | 6 (1.4)      | 4 (1.0)        | 1 (0.2)      |
| British/Irish          | 369 (92.5)     | 392 (92.7)   | 380 (93.1)     | 386 (92.1)   | 375 (95.4)     | 407 (94.9)   |
| Other                  | 10 (2.5)       | 10 (2.4)     | 9 (2.2)        | 13 (3.1)     | 3 (0.8)        | 10 (2.3)     |
| Missing                | 4 (1.0)        | 6 (1.4)      | 4 (1.0)        | 5 (1.2)      | 1 (0.3)        | 4 (0.9)      |
